# Supplementary material
Source: PubMed Central journal article supplement (PMC2655049)
Supplement: 97320630003303S1.pdf [file 97320630003303S1.pdf]

### Supplementary material

**Table 1:** Selected compounds eHiTS scores from 8 of the 10 ER $\alpha$  structures evaluated.

| Ligand being Docked     | Minimum eHiTS Score | PDB ID 2OUZ | PDB ID 1R5K | PDB ID 1SJO | PDB ID 1XP1 | PDB ID 1XP6 | PDB ID 1XP9 | PDB ID 1XPC | PDB ID 1YIM |
|-------------------------|---------------------|-------------|-------------|-------------|-------------|-------------|-------------|-------------|-------------|
| Active 1 (9803972)      | -14.589             | -12.931     | -12.958     | -14.589     | -14.508     | -13.462     | -13.559     | -14.422     | -13.391     |
| Active 2 (9894892)      | -13.343             | -12.247     | -12.755     | -13.173     | -13.067     | -13.257     | -12.168     | -13.343     | -12.84      |
| Active 4 (4859)         | -13.596             | -12.369     | -12.813     | -12.634     | -13.596     | -12.279     | -12.12      | -13.029     | -12.109     |
| Active 7 (8461628)      | -9.82               | -9.26       | -9.128      | -9.82       | -9.366      | -9.385      | -9.484      | -9.722      | -9.313      |
| Decoy 4 (9372960)       | -9.243              | -8.684      | -8.199      | -9.102      | -9.243      | -8.6        | -8.641      | -8.777      | -8.522      |
| Decoy 7 (9418926)       | -9.341              | -7.746      | -8.681      | -8.873      | -9.341      | -8.465      | -7.961      | -8.262      | -8.313      |
| Decoy 9 (9328424)       | -10.638             | -9.518      | -10.015     | -10.638     | -9.458      | -9.19       | -9.026      | -10.183     | -9.549      |
| Decoy 20 (9462726)      | -7.024              | -6.588      | -6.821      | -7.024      | -6.729      | -6.593      | -6.391      | -6.766      | -6.592      |
| MFC00796283             | -13.083             | -13.083     | -10.02      | -8.962      | -10.758     | -5.356      | -10.694     | -7.684      | -9.578      |
| MFC00795212             | -12.774             | -9.476      | -12.414     | -12.557     | -11.543     | -11.943     | -10.81      | -11.593     | -12.774     |
| MFC00191781             | -13.416             | -9.457      | -9.013      | -13.416     | -9.583      | -7.516      | -9.646      | -12.771     | -9.079      |
| MFC02684954             | -13.012             | -9.687      | -11.756     | -13.012     | -12.547     | -10.776     | -10.993     | -11.509     | -12.322     |
| MFC00965302             | -12.955             | -10.857     | -11.074     | -12.955     | -10.94      | -10.287     | -11.82      | -11.844     | -11.498     |
| MFC00051886             | -12.915             | -10.577     | -11.87      | -12.915     | -12.362     | -9.905      | -10.54      | -12.486     | -11.679     |
| MFC00043160             | -12.902             | -9.177      | -10.19      | -12.783     | -12.902     | -11.309     | -10.206     | -11.99      | -9.333      |
| MFC01096622             | -12.772             | -10.559     | -11.523     | -12.772     | -8.96       | -11.31      | -9.385      | -9.878      | -8.093      |
| MFC02684953             | -12.781             | -10.535     | -11.235     | -12.742     | -12.781     | -11.561     | -12.246     | -12.129     | -11.577     |
| MFC00031658             | -12.695             | -9.256      | -10.872     | -12.695     | -10.831     | -9.682      | -9.283      | -12.322     | -10.187     |
| MFC00159395             | -12.675             | -9.884      | -10.112     | -12.675     | -11.434     | -9.817      | -9.661      | -11.035     | -11.593     |
| MFC01325781             | -12.521             | -9.91       | -9.897      | -12.521     | -10.466     | -10.987     | -9.863      | -11.21      | -10.288     |
| MFC00031643             | -12.702             | -11.152     | -10.992     | -11.621     | -12.702     | -10.851     | -10.588     | -11.524     | -10.453     |
| MFC00228673             | -12.662             | -9.476      | -11.026     | -11.752     | -9.162      | -10.722     | -8.669      | -12.662     | -9.809      |
| MFC00226703             | -12.523             | -11.384     | -10.4       | -11.818     | -9.822      | -10.214     | -9.743      | -12.523     | -10.747     |
| TPP/Lasofixifene Hybrid | -14.119             | -14.119     | ----        | -13.018     | ----        | ----        | ----        | -5.566      | ----        |

Included are the top three scoring actives screened, the lowest scoring active screened, the top three scoring decoys screened, the lowest scoring decoy screened (all identified by their ChemSpider ID number – www.chemspider.com), all TPP cations screened which scored better than -12 on at least one ER $\alpha$  structure (identified by the MDL number for their corresponding commercially available salt form), and the TPP/Lasofixifene hybrid seen in **Figure 1f**.
